# Supplementary material for: Microbial Transformation of Pimavanserin by Cunninghamella blakesleeana AS 3.970
Source: MDPI journal article supplement (doi:10.3390/catal13081220), 2023-08-17
Supplement: s1 [file s1]

Archive with 1 entries (1 files):
- catalysts-2497113-supplementary.pdf
